# Supplementary material for: Effect of Japanese Cedar Pollen Sublingual Immunotherapy on Asthma Patients with Seasonal Allergic Rhinitis Caused by Japanese Cedar Pollen
Source: MDPI journal article supplement (doi:10.3390/biom12040518), 2022-03-29
Supplement: s1 [file s1]

**Supplemental Table S1.** Detection limits of the multiplex bead array assays

| Target         | Assay working range<br>(pg/mL) |        |
|----------------|--------------------------------|--------|
|                | LLOQ                           | ULOQ   |
| IL-1 $\beta$   | 0.27                           | 1117   |
| IL-1R $\alpha$ | 7.41                           | 121425 |
| IL-4           | 0.21                           | 856    |
| IL-5           | 0.8                            | 13069  |
| IL-7           | 0.68                           | 11063  |
| IL-8           | 0.81                           | 3315   |
| IL-9           | 1.23                           | 5031   |
| IL-10          | 0.81                           | 3321   |
| IL-12          | 1.87                           | 7667   |
| IL-13          | 0.34                           | 1400   |
| IL-17          | 2.00                           | 32716  |
| Eotaxin-1      | 0.09                           | 372    |
| Basic FGF      | 0.89                           | 14649  |
| G-CSF          | 1.73                           | 28267  |
| IFN- $\gamma$  | 0.60                           | 2455   |
| MCP-1          | 0.58                           | 2392   |
| MIP-1 $\alpha$ | 0.07                           | 1127   |
| PDGF-BB        | 1.24                           | 20331  |
| MIP-1 $\beta$  | 0.28                           | 4543   |
| RANTES         | 0.91                           | 14838  |
| TNF- $\alpha$  | 3.18                           | 52115  |
| VEGF           | 2.37                           | 38806  |

Abbreviations: FGF, fibroblast growth factor; G-CSF, granulocyte-colony stimulating factor; IFN- $\gamma$ , interferon-gamma; IL, interleukin; LLOQ, lower limit of quantification; MCP, monocyte chemoattractant protein; MIP, macrophage inflammatory protein; PDGF, platelet-derived growth factor; RANTES, regulated on activation normal T cell expressed and secreted; TNF- $\alpha$ , tumor necrosis factor- $\alpha$ ; ULOQ, upper limit of quantification; VEGF, vascular endothelial growth factor.

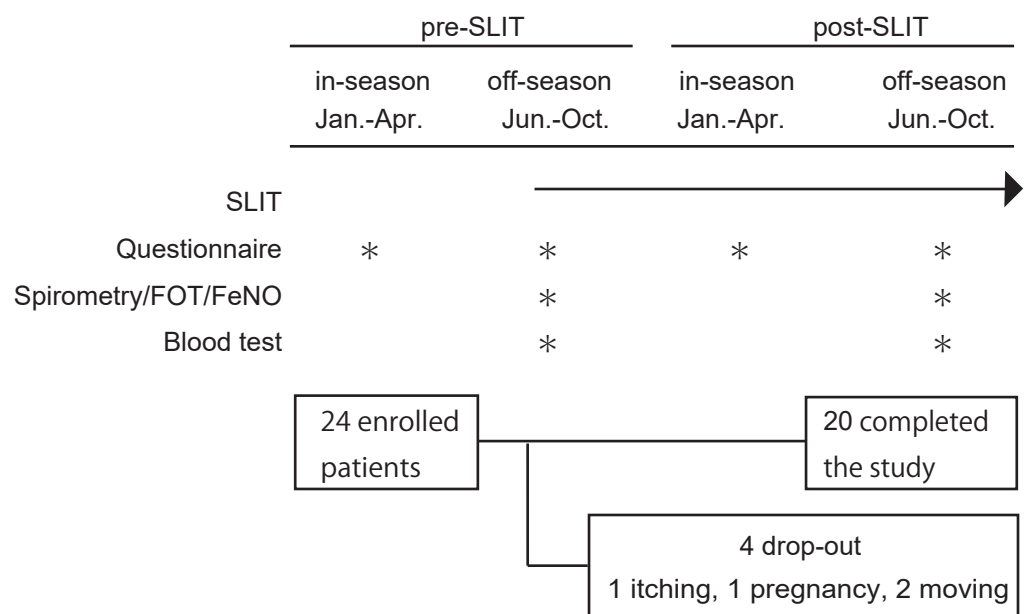

**Supplementary Figure. S1.** Flowchart of study methods with patient inclusion and exclusion in the study
